# Supplementary material
Source: publisher figshare collection journal article supplement (https://acs.figshare.com/ndownloader/files/14189483)
Supplement: Supplementary file 1 [file 14189483]

## Supporting Information

### **Natural Salep/PEGylated Chitosan Double Layer towards a More Sustainable pH-Responsive Magnetite Nanocarrier for Targeted Delivery of DOX and Hyperthermia Application**

Nasrin Zohreh,<sup>a\*</sup> Sakineh Alipour,<sup>a</sup> Seyed Hassan Hosseini,<sup>b</sup> Morena S. Xaba,<sup>c</sup> Reinout

Meijboom,<sup>c</sup> Mahdi Fasihi Ramandi,<sup>d</sup> Nazila Gholipour,<sup>e,f</sup> Mehdi Akhlaghi<sup>g</sup>

*<sup>a</sup>Department of chemistry, Faculty of Science, University of Qom, P. O. Box: 37185-359, Qom, Iran*

*<sup>b</sup>Department of Chemical Engineering, University of Science and Technology of Mazandaran, Behshahr, 48518, Iran*

*<sup>c</sup>Department of Chemistry, University of Johannesburg, P.O. Box 524, Auckland Park, 2006 Johannesburg, South Africa*

*<sup>d</sup>Molecular Biology Research Center, system biology and poisonings institute, Baqiyatallah University of Medical Sciences, Tehran, 1435116471, Iran*

*<sup>e</sup>Chemical Injuries Research Center, Systems Biology and Poisonings Institute, Baqiyatallah University of Medical Sciences, Tehran, 1435116471, Iran*

*<sup>f</sup>Faculty of Pharmacy, Baqiyatallah University of Medical Sciences, Tehran, 1435116471 Iran*

*<sup>g</sup>Research Center for Nuclear Medicine, Tehran University of Medical Sciences, Tehran, 1414713135, Iran*

#### **An introduction to the reported nanocarriers based magnetic core/polysaccharide shells**

There are many reports on the use of different types of carbohydrates in the structure of drug nanocarriers; however, most of them are liposomes, hydrogels, micelles, vesicles, and nanocapsules (some related references are provided in the introduction of the main article). In

addition, many core-shell nanocarriers have been reported that most of them are nanocarriers with magnetic core. Silica, porous carbon, or quantum QDs cores are of the other most reported inorganic cores for drug nanocarriers. It is important to note that magnetic core in these core-shell nanocarriers are also varied from Fe-based cores to iron metal and other types of magnetic inorganic cores.

However, there are some similarities in the use of magnetic core/polysaccharide shell, but the present work are different from the reported works in details. The present work describes the synthesis of a magnetic nanocarrier that is double layered. The second layer is PEGylated chitosan that is coated on the surface of one-layered DOX-loaded nanocarrier using layer-by-layer technique. The effect of second layer in the targeted release of DOX is investigated and compared to the DOX-loaded nanocarrier without second layer. Salep and PEGylated chitosan shells are natural and only minor modifications were made on them. Nanocarrier reported in the present work are based on  $\text{Fe}_3\text{O}_4$  core and we believe that it is truly different from the reported magnetic-carbohydrate core-shell nanocarriers in the type of shells (one- and double-layer), the technique of shell coating, investigation methods, hyperthermia application, and some biological results such as MTT, hemolysis, coagulation, and cellular uptake.

There are also few reports on the use of salep polysaccharide that all of them are hydrogels or carbon-based hydrogels.<sup>1-8</sup> The use of chitosan or PEGylated chitosan or polysaccharide, solely, in drug nanocarriers are also reported which is differ from the present work in the identity of being doubled layer.<sup>9-15</sup>

There are some related articles with the present work.<sup>2, 16-23</sup> However, the present work is different from these in one or more aspects such as the type of shell, biocompatibility of shells, type of polysaccharide shell, being one- or double-layered carrier, type of *in-vitro* biological analyses or their results. In addition, in most of these reported carriers, the second polymeric shell is grafted from the first shell by chemical reactions and the desired drug is loaded in the final step whereas the second shell in the present work is loaded using layer-by-layer technique.

### Characterization of nanocarriers 1 and 2 using FT-IR analysis

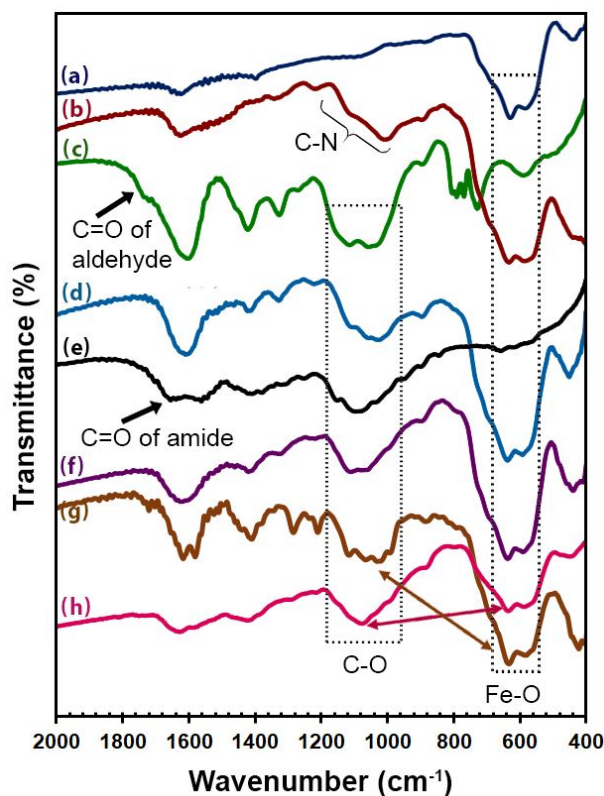

**Fig. S1** FT-IR spectra of MNP (a), MNP@NH<sub>2</sub> (b), DAS (c), MNP@DAS (d), CSP (e), MNP@DAS@CSP (f), MNP@DAS@DOX (g), and MNP@DAS@DOX@CSP (h).

### Characterization of DAS and CSP

Oxidation of salep to dialdehyde salep (DAS) was followed by FT-IR. As shown in Fig. S2-a and b, appearance of a distinct shoulder higher than 1700 cm<sup>-1</sup> in the IR spectrum of DAS related to the aldehyde C=O, confirmed the oxidation process. <sup>1</sup>H NMR also confirmed the formation of DAS through Oxidation process (Fig S3). Synthesis of CSP was also followed by FT-IR. Esteric C=O of mPEG-CO<sub>2</sub>Me is clearly appeared in Fig. S2-d compared to Fig. S2-c confirming

oxidation and esterification steps. However, FT-IR spectrum of CSP (Fig. S2-f) showed no visible change compared to chitosan (Fig. S2-e), mPEG-CO<sub>2</sub>Me grafting on chitosan was followed by GPC analysis (Fig. S4). Increasing in molar mass of CPS compared to chitosan confirmed successful grafting process. <sup>1</sup>H NMR spectrums of chitosan, mPEGCO<sub>2</sub>Me, and CSP (Fig. S5) also confirmed the grafting of mPEG-CO<sub>2</sub>Me on chitosan.

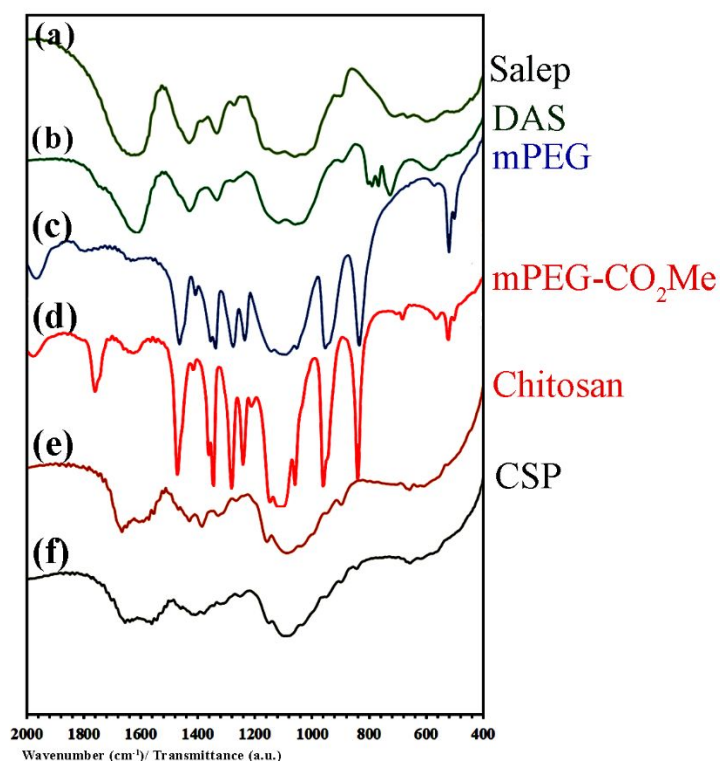

**Fig. S2** FT-IR spectra of DAS and CSP and their precursors

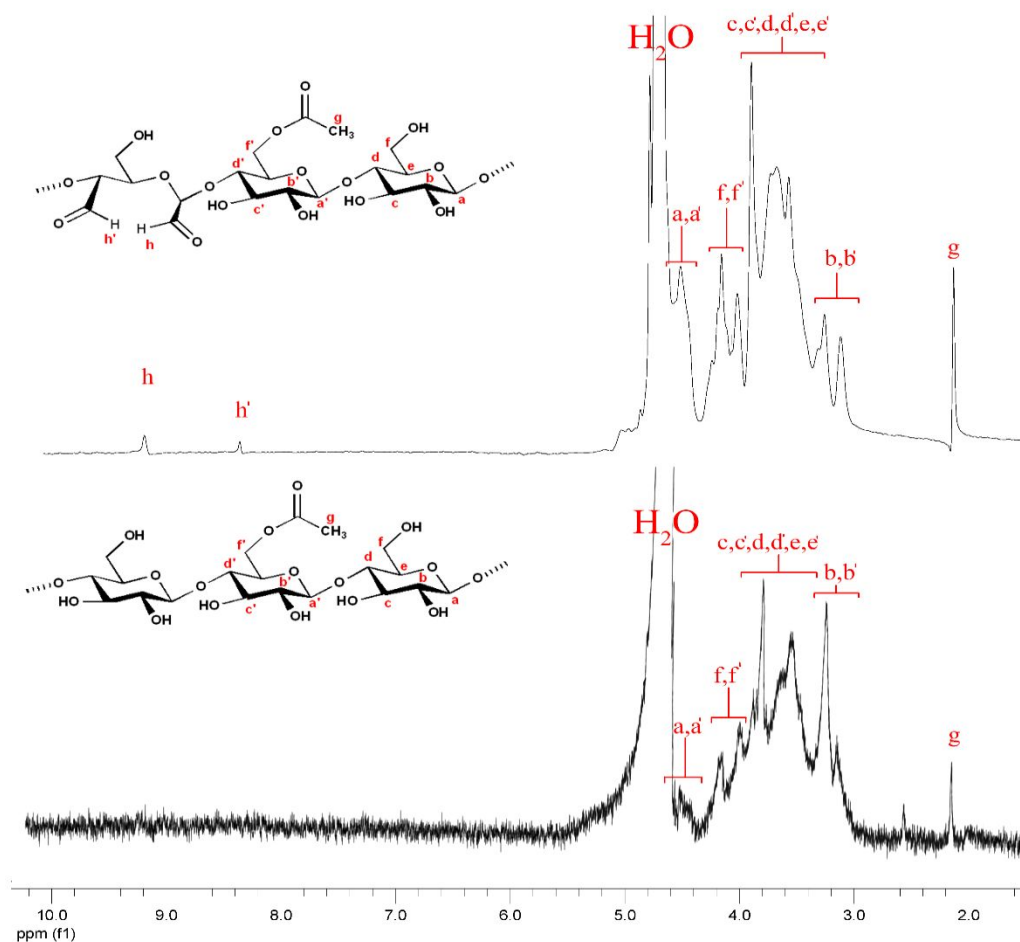

**Fig. S3**  $^1\text{H}$  NMR spectrum of salep and DAS.

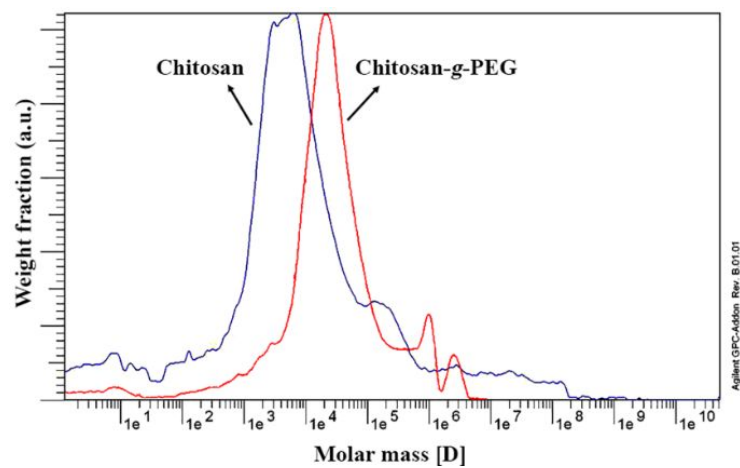

**Fig. S4** GPC analysis of chitosan and PEGylated chitosan (CSP).

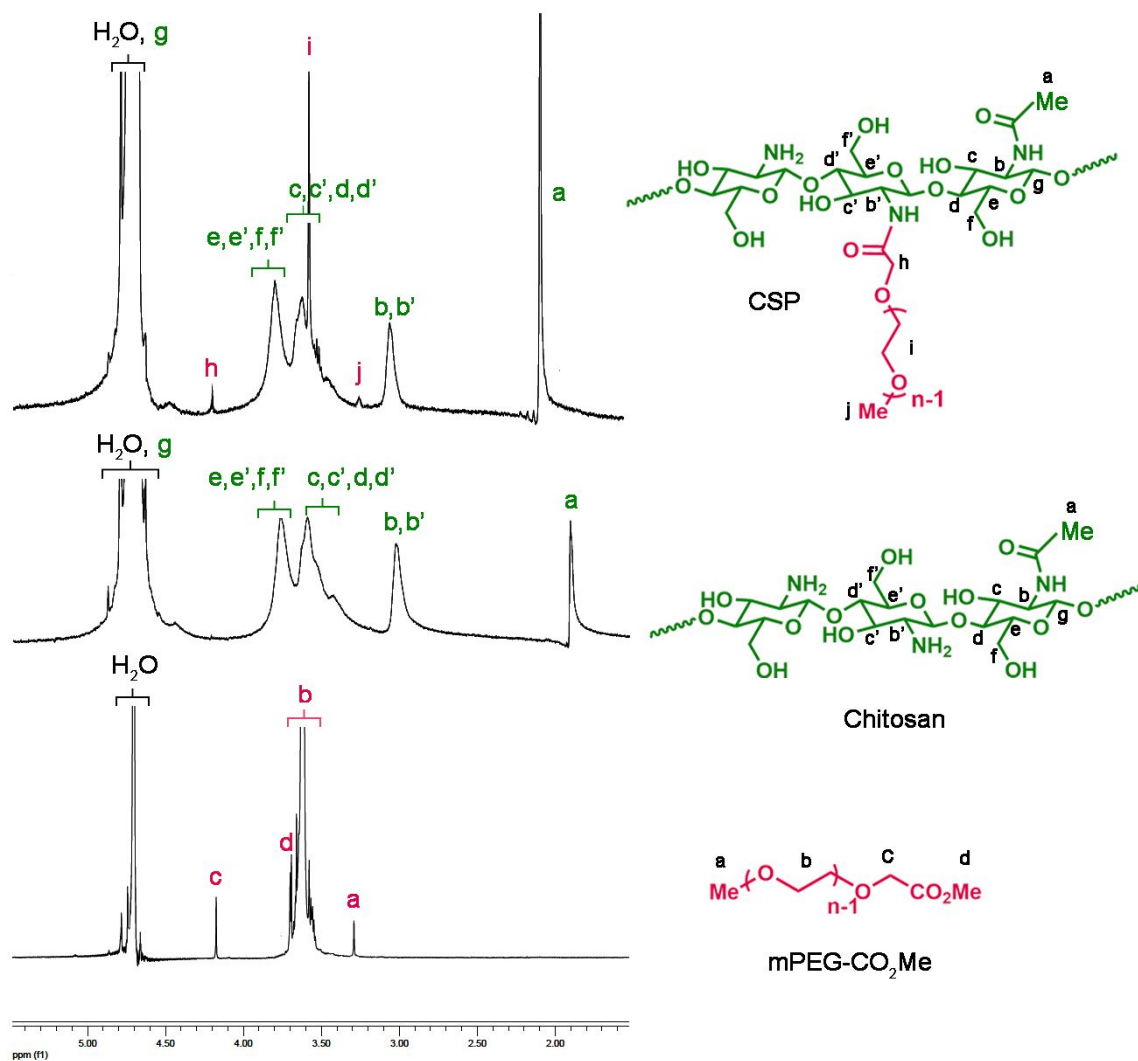

**Fig. S5** NMR spectrum of mPEG-CO<sub>2</sub>Me, chitosan, and CSP.

## Analyses for optimization of DAS loading on MNP@NH<sub>2</sub>

**Table S1:** Optimization condition for DAS loading

| Entry    | MNP@APTS:DAS<br>(w:w)  | <i>T</i> (°C) | Time (h) | <i>V</i> <sub>water</sub> (mL) | IR (Fig. S2) | TGA (Fig. S3) |
|----------|------------------------|---------------|----------|--------------------------------|--------------|---------------|
| 1        | 1:1 <sup>a</sup>       | r.t           | 5        | 100                            | a            | a             |
| <b>2</b> | <b>1:1<sup>a</sup></b> | <b>r.t</b>    | <b>5</b> | <b>10</b>                      | <b>b</b>     | <b>b</b>      |
| 3        | 1:2 <sup>b</sup>       | 50            | 5        | 5                              | c            | c             |
| 4        | 1:2 <sup>b</sup>       | r.t           | 5        | 5                              | d            | d             |
| 5        | 1:4 <sup>a</sup>       | r.t           | 24       | 10                             | e            | e             |
| 6        | 2:1 <sup>c</sup>       | r.t           | 24       | 10                             | f            | f             |

<sup>a</sup>Fe<sub>3</sub>O<sub>4</sub>@APTS (200 mg). <sup>b</sup>Fe<sub>3</sub>O<sub>4</sub>@APTS (100 mg). <sup>c</sup>Fe<sub>3</sub>O<sub>4</sub>@APTS (50 mg).

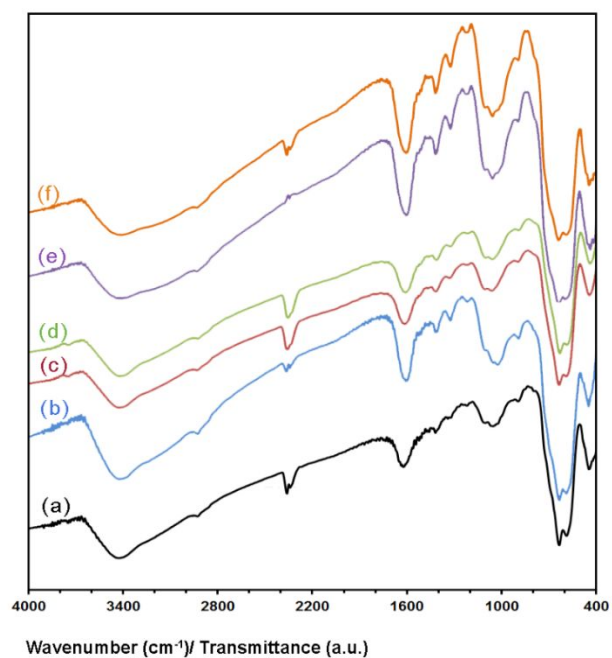

**Fig. S6** FT-IR analyses for DAS loading related to Table 1.

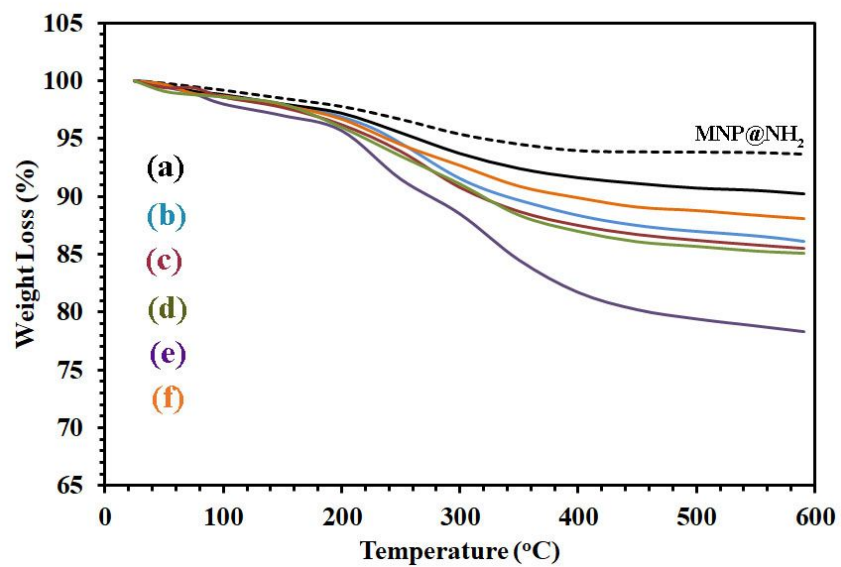

**Fig S7** TGA analyses for DAS loading onto the surface of MNP@NH<sub>2</sub> related to Table S1.



**Table S2** Comparison of DOX release from various nanocarrier at 37 °C.

| Nanocarrier                                                    | Type of nanocarrier                           | % release at pH 7.4 (time) | The difference of release between pH 5.5 and 7.4 (%) | Reference No. |
|----------------------------------------------------------------|-----------------------------------------------|----------------------------|------------------------------------------------------|---------------|
| Fe <sub>3</sub> O <sub>4</sub> @OCMC@IRMOF-3/FA                | Magnetic core, chitosan/MOF shell             | 35 (80 h)                  | 30 <sup>a</sup>                                      | 21            |
| PLGA@PEG-g-CS <sup>a</sup>                                     | Polymeric organic core, PEG/chitosan shell    | 50 (80 h)                  | n.r                                                  | 24            |
| MNP@CS                                                         | Magnetic core, chitosan shell                 | 38 (48 h)                  | 28                                                   | 25            |
| MTX-MagTSLs                                                    | Magnetic core, polymeric organic shell        | 42 (24 h)                  | n.r                                                  | 26            |
| MNP/MSN/p-NIBIM-AA                                             | MNP/MSN core, polymeric organic shell         | 62 (80 h)                  | n.r                                                  | 27            |
| MagNanoGels                                                    | Magnetic nanogel                              | 24 (6 h)                   | 70                                                   | 28            |
| MNP-MSN-PF-127                                                 | Magnetic core, polymeric organic shell        | 32 (80 h)                  | n.r                                                  | 29            |
| Fe <sub>3</sub> O <sub>4</sub> @SiO <sub>2</sub> @SC-D         | Magnetic core, polymeric organic double shell | 72 (70 h)                  | 9 <sup>b</sup>                                       | 30            |
| Fe <sub>3</sub> O <sub>4</sub> -CMC-AA-FA                      | Magnetic core, chitosan-FA shell              | 50 (80 h)                  | 31                                                   | 13            |
| IFN $\gamma$ -TSN (hyd)                                        | Organic nanocapsule                           | 40 (96 h)                  | 42                                                   | 31            |
| RPAE-PEG                                                       | micelle                                       | 38 (48 h)                  | 37                                                   | 32-33         |
| MNP@DAS@CSP                                                    | Magnetic core, organic polymer double shell   | 45 (80 h)<br>46 (135)      | 35<br>45                                             | This work     |
| <sup>a</sup> : epirubicin drug; b: pH of acid condition is 3.5 |                                               |                            |                                                      |               |

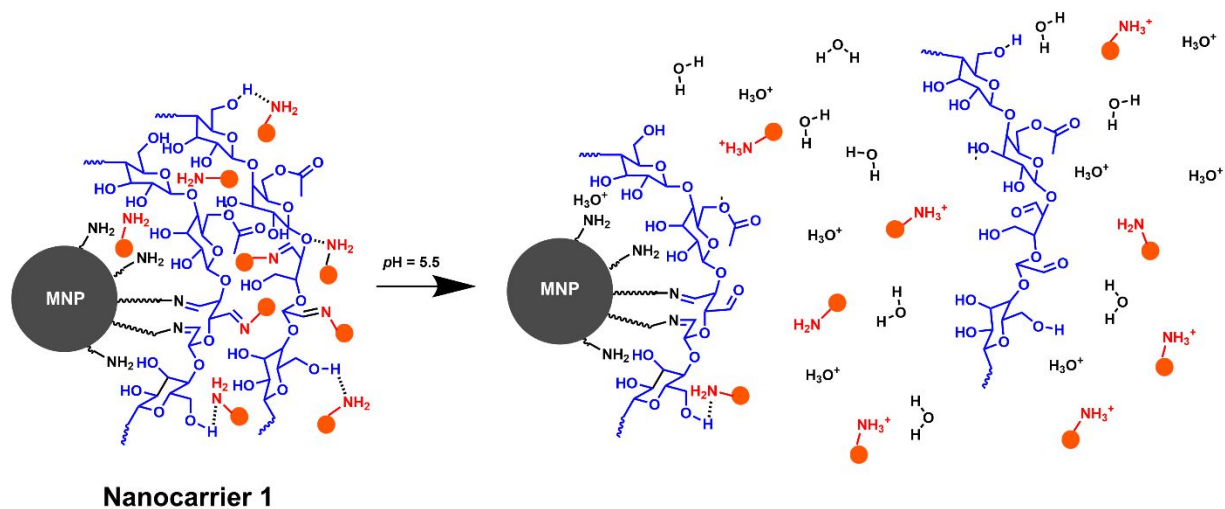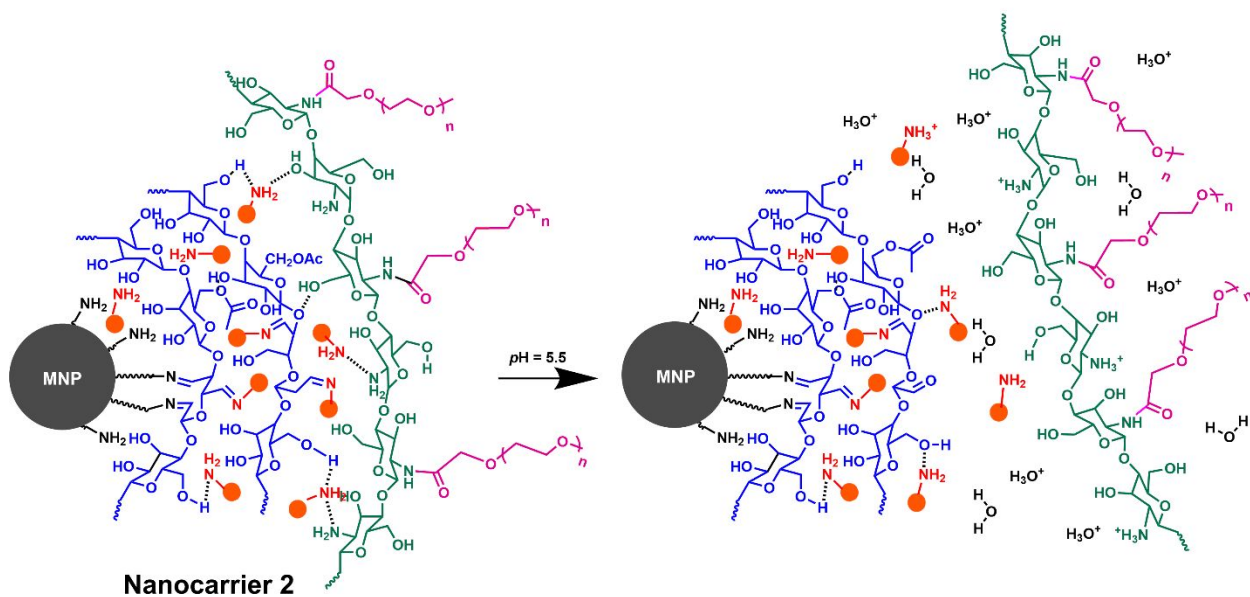

**Scheme S1.** The proposed mechanism for DOX release from nanocarrier 1 and 2.

**Table S3** Magnetic heating properties of magnetite nanoparticles and nanocarrier 2

| Sample        | Sample concentration (mg) | Fe <sub>3</sub> O <sub>4</sub> component (mg) | Initial slope of related curve | SAR   | ILP  | Time required to reach 42 °C (s) |
|---------------|---------------------------|-----------------------------------------------|--------------------------------|-------|------|----------------------------------|
| MNP           | 1                         | 1                                             | 0.0726                         | 303.5 | 1.32 | 201                              |
| MNP@DAS@CSP   | 1                         | 0.87                                          | 0.0618                         | 297   | 1.30 | 234                              |
| Nanocarrier 2 | 1                         | 0.75                                          | 0.0502                         | 280   | 1.22 | 289                              |
| Nanocarrier 2 | 2                         | 1.5                                           | 0.0854                         | 238   | 1.04 | 174                              |
| Nanocarrier 2 | 0.5                       | 0.375                                         | 0.0432                         | 481.5 | 2.11 | 347                              |
| Nanocarrier 2 | 0.3                       | 0.225                                         | 0.0286                         | 531   | 2.32 | 550                              |

$H = 300 \text{ Oe or } 23.9 \text{ kAm}^{-1}, f = 0.4 \text{ MHz}$

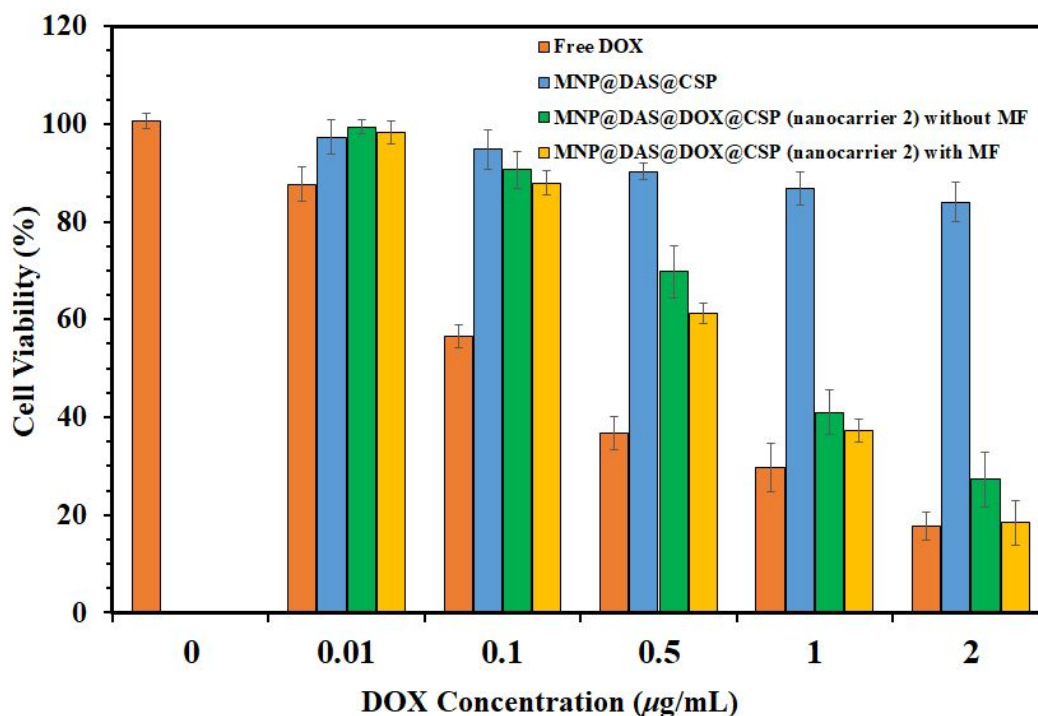**Fig. S8** Cell viability of HeLa cells after 24 h incubation with free DOX, MNP@DAS@CSP, and nanocarrier 2, with and without static magnetic field.

**Table S4** Comparison of hemolysis assay with the results of reported works

| Nanocarrier                                 | Concentration ( $\mu\text{g mL}^{-1}$ ) | % of hemolysis | Reference |
|---------------------------------------------|-----------------------------------------|----------------|-----------|
| DCP@MNPs                                    | 5-400                                   | 0.1-0.9        | 18        |
| MagTSLs                                     | 25-400                                  | < 2            | 26        |
| MWCNT/CoFe <sub>2</sub> O <sub>4</sub> -180 | 50-400                                  | 0-2            | 34        |
| Dex-SA                                      | 39-625                                  | 0              | 35        |
| MSNs-PPFA                                   | 12.5-800                                | 0.2-1.6        | 36        |
| MNP-G2                                      | 5-200                                   | 0-0.25         | 37        |
| MNP-G2@MTX                                  |                                         | 0.16-0.67      |           |
| FA-Fe <sub>3</sub> O <sub>4</sub> @nGO      | 10-400                                  | 0.01-2.46      | 38        |
| MNP@DAS@CSP                                 | 15.5-500                                | 0.07-0.35      | This work |
| MNP@DAS@DOX@CSP                             |                                         | 0.05-0.36      |           |

## References

1. Bardajee, G. R.; Hooshyar, Z., Novel potentially biocompatible nanoporous hydrogel based on poly ((2-dimethylaminoethyl) methacrylate) grafted onto salep: synthesis, swelling behavior and drug release study. *J. Polym. Res.* **2013**, *20* (1), 1.
2. Bardajee, G. R.; Hooshyar, Z., One-pot synthesis of biocompatible superparamagnetic iron oxide nanoparticles/hydrogel based on salep: Characterization and drug delivery. *Carbohydr. Polym.* **2014**, *101*, 741-751.
3. Bardajee, G. R.; Hooshyar, Z., Drug release study by a novel thermo sensitive nanogel based on salep modified graphene oxide. *J. Polym. Res.* **2017**, *24* (3), 49.
4. Bardajee, G. R.; Hooshyar, Z.; Farsi, M.; Mobini, A.; Sang, G., Synthesis of a novel thermo/pH sensitive nanogel based on salep modified graphene oxide for drug release. *Mater. Sci. Eng. C* **2017**, *72*, 558-565.

5. Bardajee, G. R.; Mizani, F.; Hosseini, S. S., pH sensitive release of doxorubicin anticancer drug from gold nanocomposite hydrogel based on poly(acrylic acid) grafted onto salep biopolymer. *J. Polym. Res.* **2017**, *24* (3), 48.
6. Bardajee, G. R.; Pourjavadi, A.; Ghavami, S.; Soleyman, R.; Jafarpour, F., UV-prepared salep-based nanoporous hydrogel for controlled release of tetracycline hydrochloride in colon. *J. Photochem. Photobiol. B* **2011**, *102* (3), 232-240.
7. Bardajee, G. R.; Pourjavadi, A.; Soleyman, R., Novel nano-porous hydrogel as a carrier matrix for oral delivery of tetracycline hydrochloride. *Colloids Surf. A: Physicochem. Eng. Asp.* **2011**, *392* (1), 16-24.
8. Beiranvand, Z.; Bani, F.; Kakanejadifard, A.; Laurini, E.; Fermeglia, M.; Pricl, S.; Adeli, M., Anticancer drug delivery systems based on specific interactions between albumin and polyglycerol. *RSC Adv.* **2016**, *6* (14), 11266-11277.
9. Unsoy, G.; Khodadust, R.; Yalcin, S.; Mutlu, P.; Gunduz, U., Synthesis of Doxorubicin loaded magnetic chitosan nanoparticles for pH responsive targeted drug delivery. *Eur. J. Pharm. Sci.* **2014**, *62*, 243-250.
10. Keskin, T.; Yalcin, S.; Gunduz, U., Folic acid functionalized PEG coated magnetic nanoparticles for targeting anti-cancer drug delivery: Preparation, characterization and cytotoxicity on Doxorubicin, Zoledronic acid and Paclitaxel resistant MCF-7 breast cancer cell lines. *Inorganic and Nano-Metal Chemistry* **2018**, 1-10.
11. Fu, C.; Yang, R.-M.; Wang, L.; Li, N.-n.; Qi, M.; Xu, X.-d.; Wei, X.-h.; Jiang, X.-Q.; Zhang, L.-M., Surface functionalization of superparamagnetic nanoparticles by an acid-labile polysaccharide-based prodrug for combinatorial monitoring and chemotherapy of hepatocellular carcinoma. *RSC Adv.* **2017**, *7* (66), 41919-41928.

12. Lin, J.; Li, Y.; Li, Y.; Wu, H.; Yu, F.; Zhou, S.; Xie, L.; Luo, F.; Lin, C.; Hou, Z., Drug/dye-loaded, multifunctional PEG–chitosan–iron oxide nanocomposites for methotrexate synergistically self-targeted cancer therapy and dual model imaging. *ACS Appl. Mater. Interfaces* **2015**, 7 (22), 11908-11920.
13. Sahu, S. K.; Maiti, S.; Pramanik, A.; Ghosh, S. K.; Pramanik, P., Controlling the thickness of polymeric shell on magnetic nanoparticles loaded with doxorubicin for targeted delivery and MRI contrast agent. *Carbohydr. Polym.* **2012**, 87 (4), 2593-2604.
14. Wu, J.; Jiang, W.; Shen, Y.; Tian, R., Synthesis and characterization of mesoporous magnetic nanocomposites wrapped with chitosan gatekeepers for pH-sensitive controlled release of doxorubicin. *Mater. Sci. Eng. C* **2017**, 70, 132-140.
15. Hussein-Al-Ali, S. H.; Arulselvan, P.; Fakurazi, S.; Hussein, M. Z.; Dorniani, D., Arginine–chitosan-and arginine–polyethylene glycol-conjugated superparamagnetic nanoparticles: Preparation, cytotoxicity and controlled-release. *Journal of biomaterials applications* **2014**, 29 (2), 186-198.
16. Rahimi, M.; Safa, K. D.; Alizadeh, E.; Salehi, R., Dendritic chitosan as a magnetic and biocompatible nanocarrier for the simultaneous delivery of doxorubicin and methotrexate to MCF-7 cell line. *New J. Chem.* **2017**, 41 (8), 3177-3189.
17. Ding, Y.; Shen, S. Z.; Sun, H.; Sun, K.; Liu, F.; Qi, Y.; Yan, J., Design and construction of polymerized-chitosan coated Fe<sub>3</sub>O<sub>4</sub> magnetic nanoparticles and its application for hydrophobic drug delivery. *Mater. Sci. Eng. C* **2015**, 48, 487-498.
18. Rahimi, M.; Safa, K. D.; Salehi, R., Co-delivery of doxorubicin and methotrexate by dendritic chitosan-g-mPEG as a magnetic nanocarrier for multi-drug delivery in combination chemotherapy. *Polymer Chemistry* **2017**, 8 (47), 7333-7350.

19. Rafi, A. A.; Mahkam, M., Preparation of magnetic pH-sensitive microcapsules with an alginate base as colon specific drug delivery systems through an entirely green route. *RSC Adv.* **2015**, 5 (6), 4628-4638.
20. Pourjavadi, A.; Tehrani, Z. M.; Hosseini, S. H., Dendritic magnetite decorated by pH-responsive PEGylated starch: a smart multifunctional nanocarrier for the triggered release of anti-cancer drugs. *RSC Adv.* **2015**, 5 (60), 48586-48595.
21. Chowdhuri, A. R.; Singh, T.; Ghosh, S. K.; Sahu, S. K., Carbon dots embedded magnetic nanoparticles@ chitosan@ metal organic framework as a nanoprobe for pH sensitive targeted anticancer drug delivery. *ACS Appl. Mater. Interfaces* **2016**, 8 (26), 16573-16583.
22. Li, Y.; Yuan, D.; Dong, M.; Chai, Z.; Fu, G., Facile and Green Synthesis of Core–Shell Structured Magnetic Chitosan Submicrospheres and Their Surface Functionalization. *Langmuir* **2013**, 29 (37), 11770-11778.
23. Li, X.; Feng, J.; Zhang, R.; Wang, J.; Su, T.; Tian, Z.; Han, D.; Zhao, C.; Fan, M.; Li, C., Quaternized chitosan/alginate-Fe<sub>3</sub>O<sub>4</sub> magnetic nanoparticles enhance the chemosensitization of multidrug-resistant gastric carcinoma by regulating cell autophagy activity in mice. *Journal of biomedical nanotechnology* **2016**, 12 (5), 948-961.
24. Qin, J.; Wei, X.; Chen, H.; Lv, F.; Nan, W.; Wang, Y.; Zhang, Q.; Chen, H., mPEG-g-CS-Modified PLGA Nanoparticle Carrier for the Codelivery of Paclitaxel and Epirubicin for Breast Cancer Synergistic Therapy. *ACS Biomater. Sci. Eng.* **2018**, 4 (5), 1651-1660.
25. Wang, X.; Wang, L.; Tan, X.; Zhang, H.; Sun, G., Construction of doxorubicin-loading magnetic nanocarriers for assaying apoptosis of glioblastoma cells. *J. Colloid. Interface. Sci.* **2014**, 436, 267-275.

26. Guo, Y.; Zhang, Y.; Ma, J.; Li, Q.; Li, Y.; Zhou, X.; Zhao, D.; Song, H.; Chen, Q.; Zhu, X., Light/magnetic hyperthermia triggered drug released from multi-functional thermo-sensitive magnetoliposomes for precise cancer synergetic theranostics. *J. Control. Release* **2018**, *272*, 145-158.
27. Shin, U. S.; Seo, J.-W.; Kundu, B.; Kim, H.-W.; Eltohamy, M., Super-magnetic smart hybrid doxorubicin loaded nanoparticles effectively target breast adenocarcinoma cells. *Microporous Mesoporous Mater.* **2017**, *243*, 206-213.
28. Cazares-Cortes, E.; Espinosa, A.; Guigner, J.-M.; Michel, A.; Griffete, N.; Wilhelm, C.; Ménager, C., Doxorubicin intracellular remote release from biocompatible oligo (ethylene glycol) methyl ether methacrylate-based magnetic Nanogels triggered by magnetic hyperthermia. *ACS Appl. Mater. Interfaces* **2017**, *9* (31), 25775-25788.
29. Heggannavar, G. B.; Hiremath, C. G.; Achari, D. D.; Pangarkar, V. G.; Kariduraganavar, M. Y., Development of Doxorubicin-Loaded Magnetic Silica–Pluronic F-127 Nanocarriers Conjugated with Transferrin for Treating Glioblastoma across the Blood–Brain Barrier Using an in Vitro Model. *ACS omega* **2018**, *3* (7), 8017-8026.
30. Li, Z.; Yuan, D.; Jin, G.; Tan, B. H.; He, C., Facile layer-by-layer self-assembly toward enantiomeric poly (lactide) stereocomplex coated magnetite nanocarrier for highly tunable drug deliveries. *ACS Appl. Mater. Interfaces* **2016**, *8* (3), 1842-1853.
31. Yin, Y.; Hu, Q.; Xu, C.; Qiao, Q.; Qin, X.; Song, Q.; Peng, Y.; Zhao, Y.; Zhang, Z., Co-delivery of Doxorubicin and Interferon- $\gamma$  by Thermosensitive Nanoparticles for Cancer Immunochemotherapy. *Molecular pharmaceutics* **2018**, *15* (9), 4161-4172.



32. Fortin, J.-P.; Wilhelm, C.; Servais, J.; Ménager, C.; Bacri, J.-C.; Gazeau, F., Size-sorted anionic iron oxide nanomagnets as colloidal mediators for magnetic hyperthermia. *Journal of the American Chemical Society* **2007**, *129* (9), 2628-2635.
33. Chen, J.; Qiu, X.; Ouyang, J.; Kong, J.; Zhong, W.; Xing, M. M., pH and reduction dual-sensitive copolymeric micelles for intracellular doxorubicin delivery. *Biomacromolecules* **2011**, *12* (10), 3601-3611.
34. Wu, H.; Liu, G.; Wang, X.; Zhang, J.; Chen, Y.; Shi, J.; Yang, H.; Hu, H.; Yang, S., Solvothermal synthesis of cobalt ferrite nanoparticles loaded on multiwalled carbon nanotubes for magnetic resonance imaging and drug delivery. *Acta biomaterialia* **2011**, *7* (9), 3496-3504.
35. Li, M.; Tang, Z.; Lv, S.; Song, W.; Hong, H.; Jing, X.; Zhang, Y.; Chen, X., Cisplatin crosslinked pH-sensitive nanoparticles for efficient delivery of doxorubicin. *Biomaterials* **2014**, *35* (12), 3851-3864.
36. Zhou, X.; Chen, L.; Nie, W.; Wang, W.; Qin, M.; Mo, X.; Wang, H.; He, C., Dual-responsive mesoporous silica nanoparticles mediated codelivery of doxorubicin and Bcl-2 SiRNA for targeted treatment of breast cancer. *The Journal of Physical Chemistry C* **2016**, *120* (39), 22375-22387.
37. Landarani-Isfahani, A.; Moghadam, M.; Mohammadi, S.; Royvaran, M.; Moshtael-Arani, N.; Rezaei, S.; Tangestaninejad, S.; Mirkhani, V.; Mohammadpoor-Baltork, I., Elegant pH-responsive nanovehicle for drug delivery based on triazine dendrimer modified magnetic nanoparticles. *Langmuir* **2017**, *33* (34), 8503-8515.
38. Li, D.; Deng, M.; Yu, Z.; Liu, W.; Zhou, G.; Li, W.; Wang, X.; Yang, D.-P.; Zhang, W., Biocompatible and stable GO-coated Fe<sub>3</sub>O<sub>4</sub> nanocomposite: A robust drug delivery carrier for

simultaneous tumor MR imaging and targeted therapy. *ACS Biomater. Sci. Eng.* **2018**, *4* (6), 2143-2154.
